# Supplementary material
Source: PubMed Central journal article supplement (PMC6029451)

## SUPPLEMENTAL INFORMATION

### p300-Mediated Lysine 2-Hydroxyisobutyrylation Regulates Glycolysis

He Huang,<sup>1,5</sup> Shuang Tang,<sup>2,5</sup> Ming Ji,<sup>2,5</sup> Zhanyun Tang,<sup>3</sup> Miho Shimada,<sup>3</sup> Xiaojing Liu,<sup>4</sup> Shankang Qi,<sup>1</sup> Jason W. Locasale,<sup>4</sup> Robert G. Roeder,<sup>3</sup> Yingming Zhao,<sup>1,\*</sup> and Xiaoling Li<sup>2,6,\*</sup>

<sup>1</sup>Ben May Department for Cancer Research, The University of Chicago, Chicago, IL 60637

<sup>2</sup>Signal Transduction Laboratory, National Institute of Environmental Health Sciences, Research Triangle Park, NC 27709

<sup>3</sup>Laboratory of Biochemistry and Molecular Biology, The Rockefeller University, New York, NY 10065

<sup>4</sup>Department of Pharmacology and Cancer Biology, Duke Cancer Institute, Duke Molecular Physiology Institute, Duke University School of Medicine, Durham, NC 27710

<sup>5</sup>These authors contribute equally to this work.

<sup>6</sup>Lead contact

\* Correspondence: X.L., [lix3@niehs.nih.gov](mailto:lix3@niehs.nih.gov), Y. Z., [yingming.zhao@uchicago.edu](mailto:yingming.zhao@uchicago.edu)

Running title: p300 regulates glycolysis through lysine 2-hydroxyisobutyrylation

Key words: p300, lysine 2-hydroxyisobutyrylation, glycolysis, cell survival

## **SUPPLEMENTAL FIGURE LEGENDS**

### **Figure S1. p300 Catalyzes Histone Khib, Related to Figure 1.**

(A) Dose-dependent inhibition of p300 by C646 reduces Khib and Kac levels of histones in cells. HeLa cells and HEK293T cells were treated with a p300 inhibitor C646 at indicated concentration for 24 hours, and the Khib and Kac levels of histones were analyzed by immuno-blotting with indicated antibodies.

(B) Schematic of the p53 dependent cell-free transcription assay.

### **Figure S2. Systematic Profiling of Kac and Khib proteomes in WT and P300 KO Cells, Related to Figure 2.**

(A) Schematic representation of experimental workflow for the SILAC quantification of p300-regulated acetylome and 2-hydroxyisobutyrylome.

(B) Venn diagram showing the overlap between replications.

(C) Histogram showing the Kac and Khib site distribution.

(D) p300 catalyzes acetylation and 2-hydroxyisobutyrylation on distinct lysine residues in a variety of protein substrates. Venn diagram showing overlap of the identified total Kac and Khib sites in HCT116 cells.

(E) The Venn diagrams show cellular compartment distribution of all identified Khib and Kac proteins.

### **Figure S3. p300 deficiency results in defective glycolysis, Related to Figure 4.**

(A) p300 KO HCT116 cells have alteration in glycolysis or gluconeogenesis. WT and p300 KO HCT116 cells were cultured in complete medium or glucose free medium for 6 hours. The relative abundance of metabolites involved in glycolysis, TCA cycle, PPP, and glutamine pathway was displayed by the heat map.

(B) Deletion of p300 significantly alters glycolysis or gluconeogenesis. The metabolites with fold change (KO/WT<0.5) and  $p < 0.05$  ( $n=3$ ) were analyzed by the pathway enrichment analysis and the pathway topology analysis in the Pathway Analysis module of MetaboAnalyst 3.0.

(C) p300 KO HCT116 cells have altered glycolysis and TCA cycle when cultured in complete medium.

(D) Deletion of p300 in HCT116 cells using Crispr/Cas technology reduces glycolysis. The glycolysis activity was analyzed by the Seahorse analyzer ( $n=4$ , values are expressed as mean  $\pm$ SEM). p300 Crispr KO HCT116 cells were generated as described in the STAR Methods.

**Figure S4. p300-mediated 2-hydroxyisobutyrylation regulates glycolysis in HCT116 cells, Related to Figure 5.**

(A) p300 KO HCT116 cells have normal expression levels of most genes involved in glucose metabolism. Relative mRNA levels of genes involved in glycolysis in WT and p300 KO HCT116 cells ( $n=3$  from 2 pairs of WT and p300 HCT116 cells,  $*p < 0.05$ , values are expressed as mean  $\pm$ SEM).

(B) The protein levels of ENO1, PFKM, and GLUT1 in WT and p300 KO HCT116 cells.

(C) The Khib level of endogenous PFKM is reduced in p300 deficient HCT116 cells. Endogenous PFKM proteins were immuno-purified from WT, p300 KO, p300 crispr KO HCT116 cells, and the Khib and Kac levels of the purified proteins were analyzed.

(D) The p300-targeted Khib sites are on the surface of ENO1 (PDB entry 2PSN). The structure of ENO1 dimer is shown as cartoon and the modified lysine residues are marked as purple.

(E) The K281R mutant ENO1 protein has reduced Khib levels. WT HA-ENO1 or K281R HA-ENO1 proteins were immune-purified using a mouse monoclonal anti-HA antibody (sc-7392) from HCT116 and HEK293T cells, and the Khib, Kac, and total HA-ENO1 levels of the purified proteins were analyzed using indicated rabbit antibodies.

(F) The K281R mutant ENO1 protein displays a comparable stability as WT ENO1 in cells. HCT116 cells expressing WT HA-ENO1 or K281R HA-ENO1 protein were treated with 100 µg/ml cycloheximide (CHX) for indicated times and the levels of these protein were analyzed by immuno-blotting using anti-HA antibodies.

**Figure S5. p300 deficiency in HEK293T cells and SW620 cells reduces glycolysis and results in hyper-sensitivity glucose depletion, Related to Figure 7.**

(A) Protein levels of HA-ENO1 in WT and p300 KO HEK293T cells transfected with either empty vector (Vec) or constructs expressing WT HA-ENO1 or K281R HA-ENO1 proteins.

(B) mRNA levels of ENO1 in HEK293T cells transfected with a construct expressing control shRNA (shControl), constructs expressing shRNA against 3' UTR of ENO1 (shENO1), the shENO1 constructs together with a construct containing the coding region of the WT ENO1 gene (shENO1 WT ENO1), or the shENO1 constructs together with a construct containing the coding region of the K281R ENO1 gene (shENO1 K281R ENO1). The mRNA levels of ENO1 in these three cells were analyzed by qPCR. Please note that constructs expressing shRNA against 3' UTR of ENO1 efficiently knocked down the endogenous ENO1 mRNA (probed by primers targeting ENO1 3'UTR), and constructs containing the coding region of WT or K281R ENO1 genes brought the total ENO1 levels back to the control levels (probed by primers targeting the ENO1 coding region).

(C) WT and K281T ENO1 have comparable protein levels in shENO1 HEK293T cells.

(D) shRNA-mediated knockdown of p300 in SW620 cells. The protein levels of p300 in WT and p300 knockdown cells were analyzed by immuno-blotting.

(E) p300 knockdown SW620 cells have reduced ENO1 activity (n=3, values are expressed as mean ±SEM).

(F-G) p300 knockdown SW620 cells are hypersensitive to glucose depletion. WT and p300 knockdown cells were cultured for 72 hours in indicated medium, and cell death was analyzed by

FACS as described in STAR Methods (n=3, \*p<0.05, values are expressed as mean  $\pm$ SEM). Bar in (F), 100  $\mu$ m.

**A**

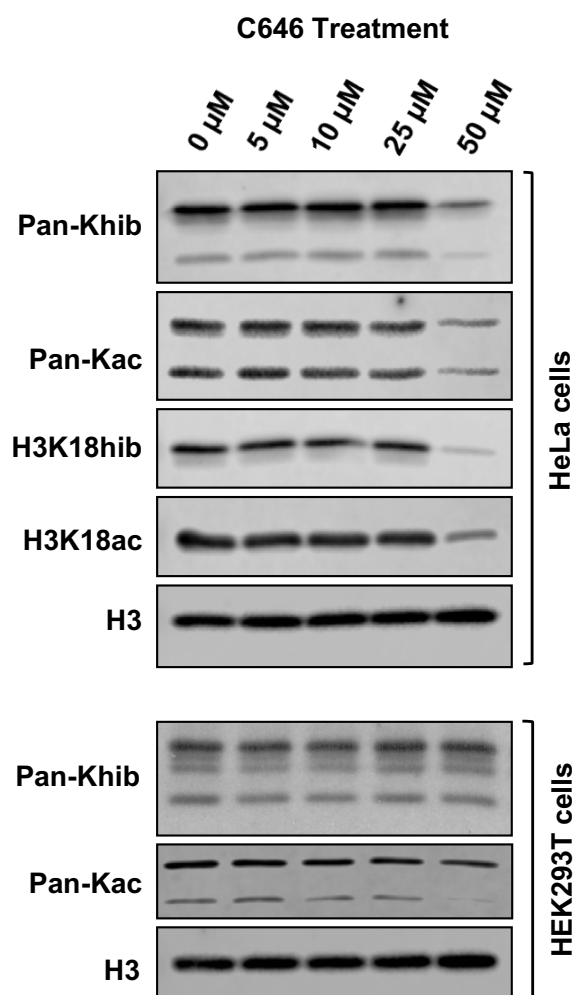

**B**

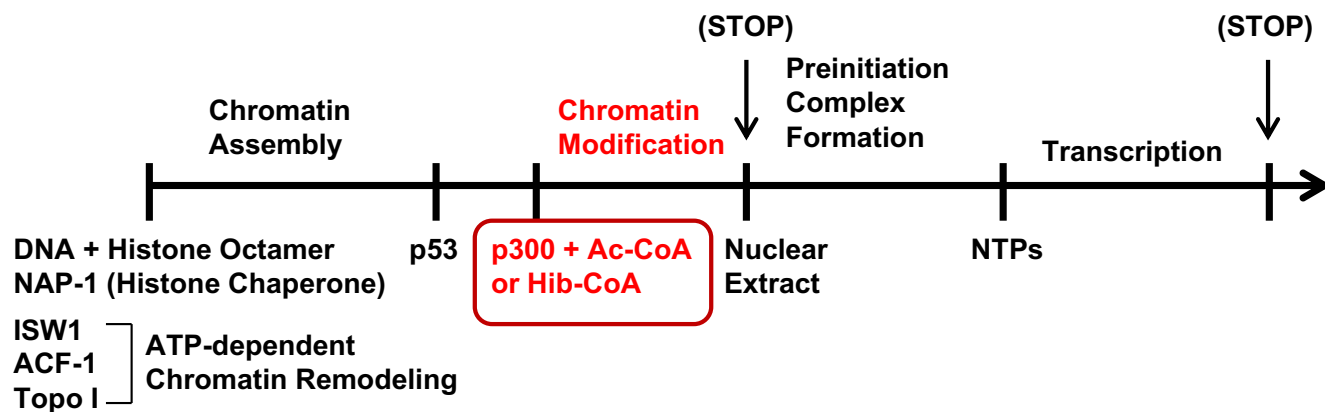

**A**

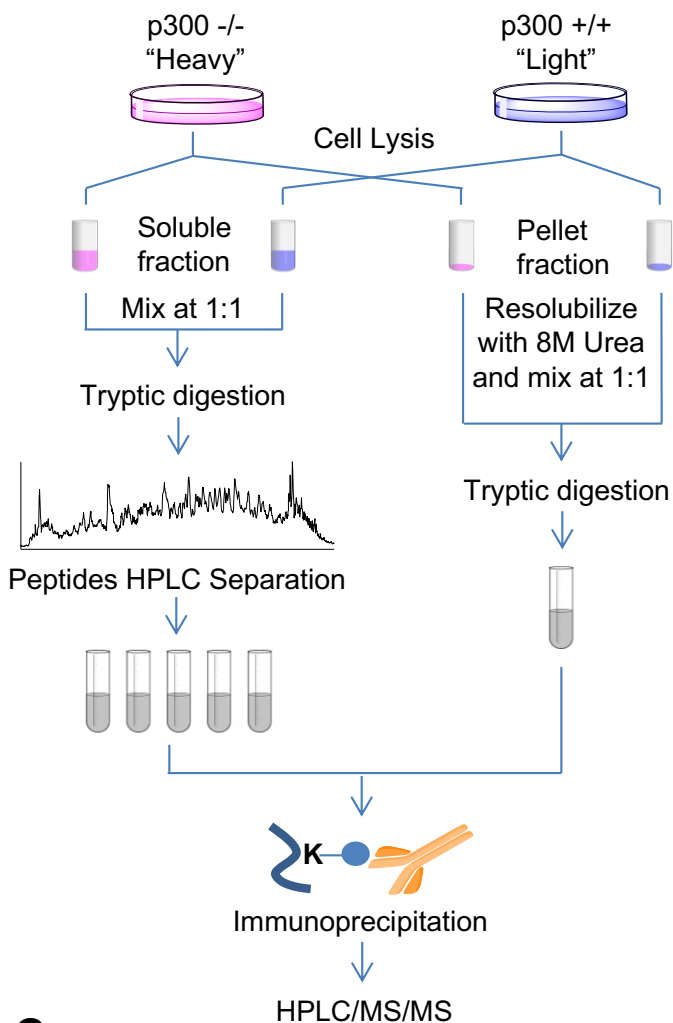

**B**

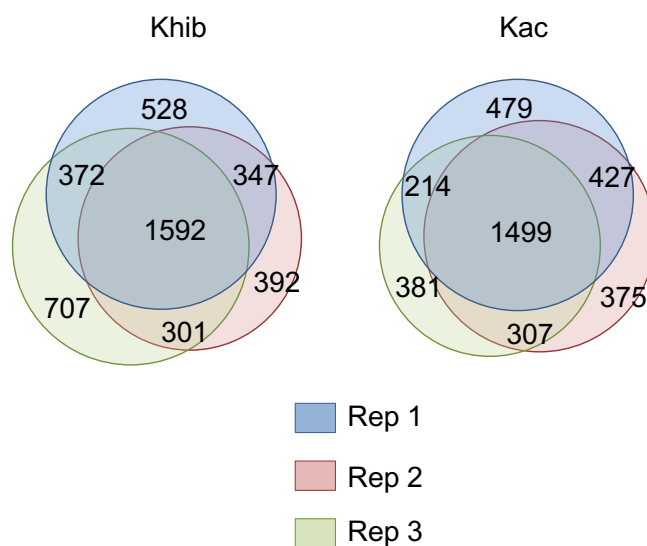

**D**

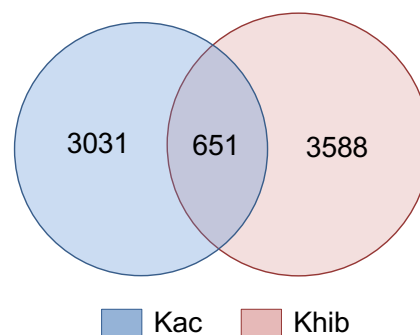

**C**

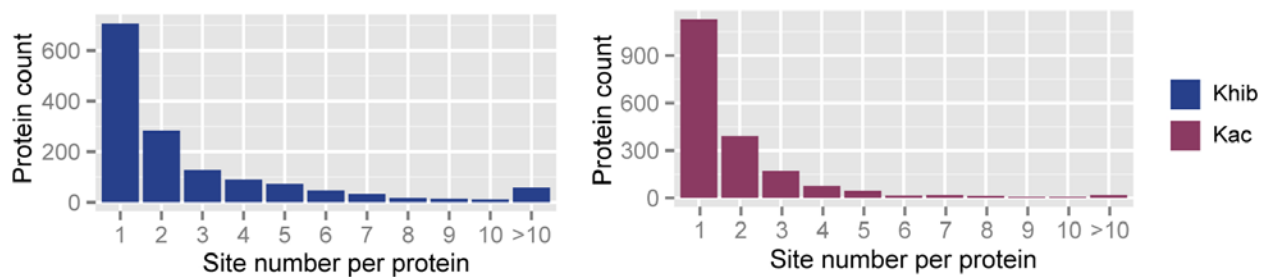

**E**

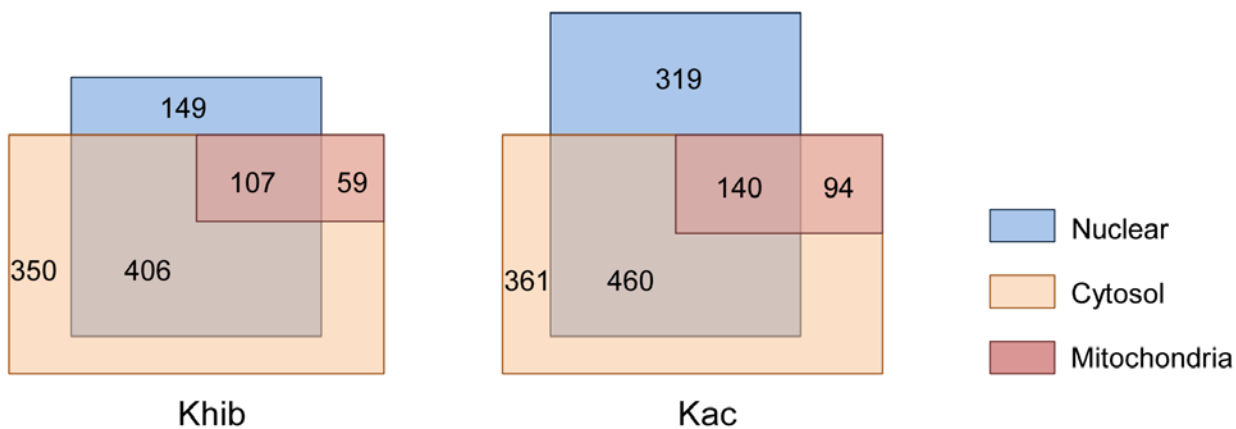

**A**

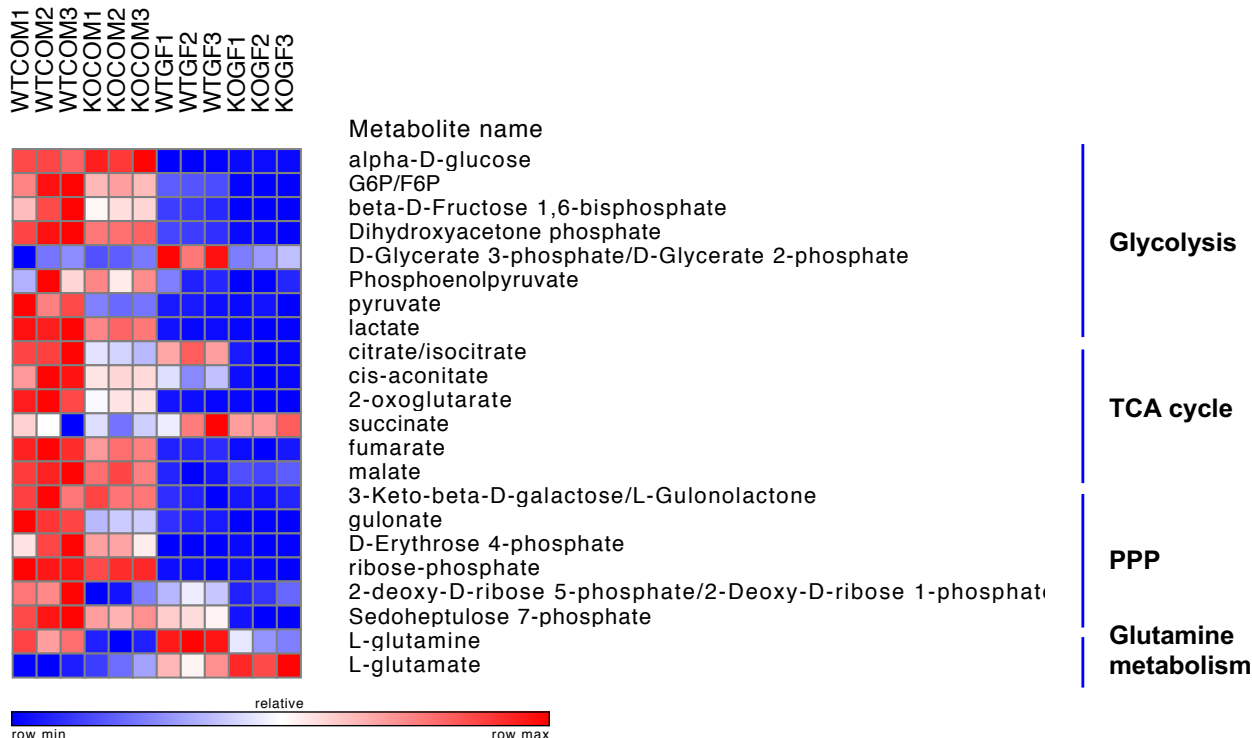

**B**

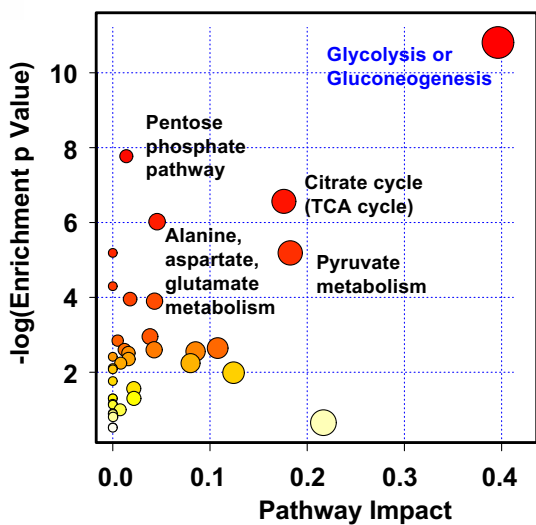

**C**

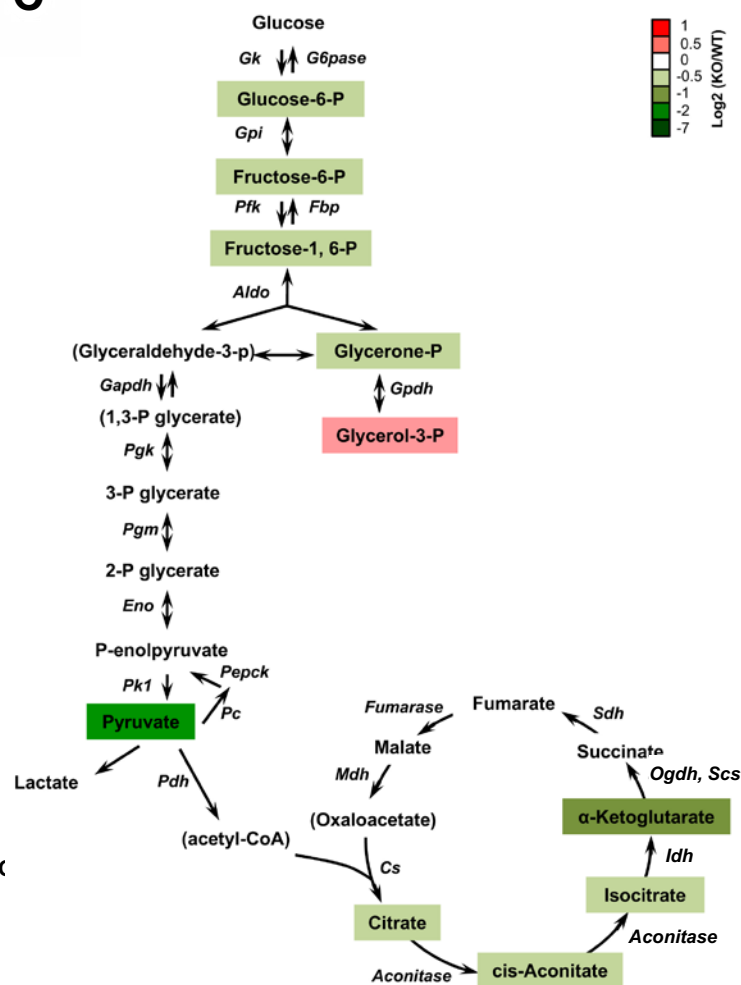

**D**

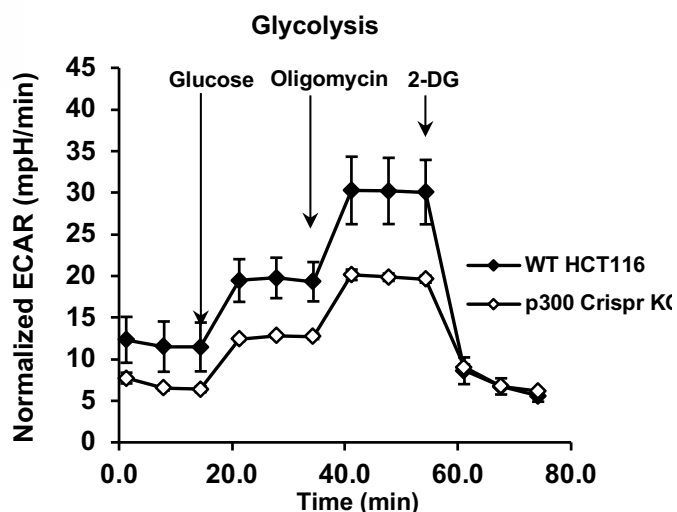





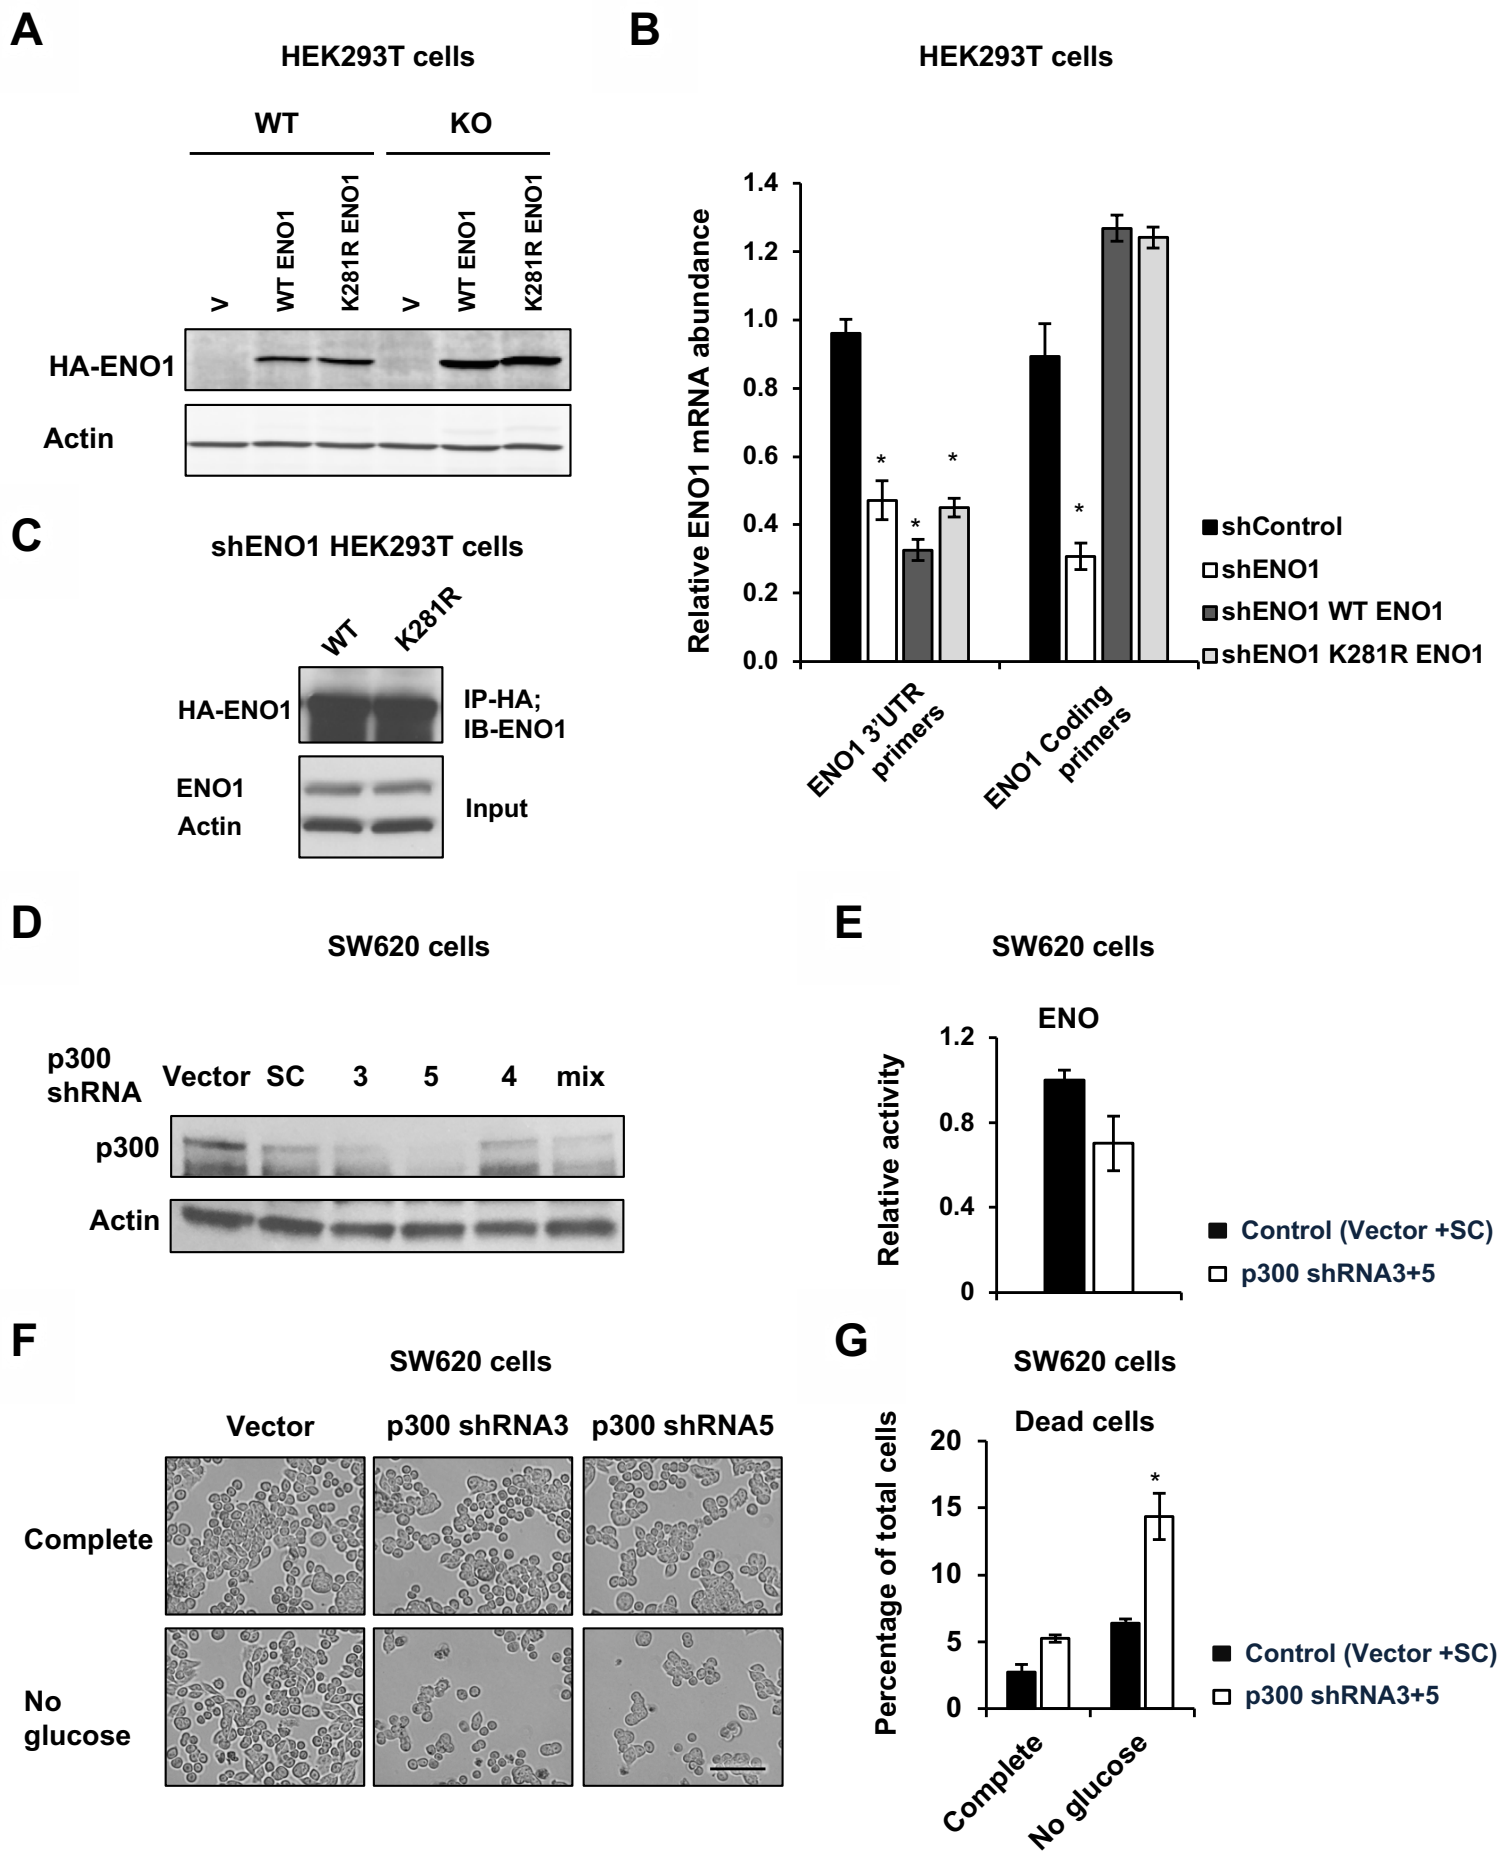

Supplement: NIHMS961681-supplement-1.pdf [file NIHMS961681-supplement-1.pdf]
